# Supplementary material for: Development of a genetic sensor that eliminates p53 deficient cells
Source: PubMed Central journal article supplement (PMC5684360; doi:10.1038/s41467-017-01688-w), 2017-11-13
Supplement: 41467_2017_1688_MOESM1_ESM.pdf [file 41467_2017_1688_MOESM1_ESM.pdf]

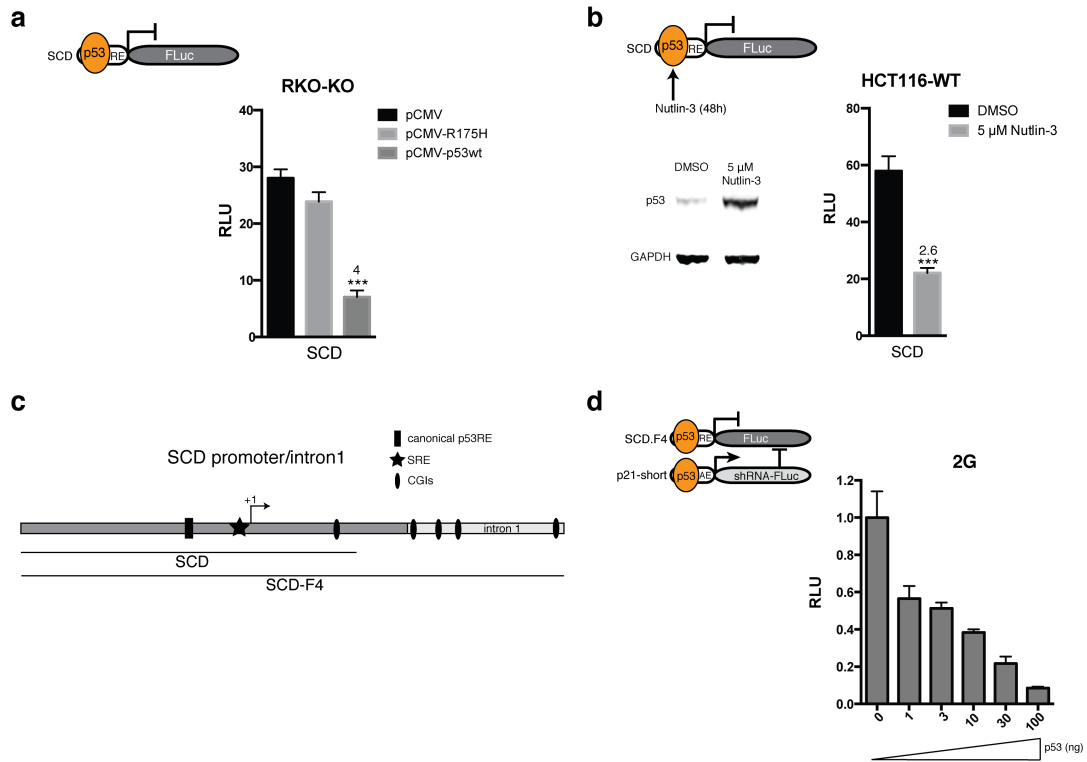

**Supplementary figure 1: An element derived from *SCD* gene is robustly repressed by p53.** (a) Relative luciferase expression is shown for the SCD element in RKO p53 KO cells. The repression fold was calculated between pCMV and pCMV-p53wt cotransfections and is given as number above the bar. (b) Left; western blot depicts increase in p53 levels upon Nutlin-3 treatment of HCT116 p53 WT cells. Right; luciferase response of the SCD element in HCT116 p53 WT cells upon treatment with Nutlin-3. The suppression fold is given as number above the bar. (c) Schematic representation of *SCD* promoter and 5'UTR/intron1. Comparison between SCD and SCD.F4 fragments is shown (RE – repressed element; SRE – sterol regulatory element; CGIs – CpG islands). (d) Luciferase response of the SCD.F4 element in combination with p21.short-shRNA targeting luciferase is dose-dependently suppressed by p53 in HCT116 p53 KO cells. (a, b and d) Error bars represent standard deviation (SD) of 3 independent experiments and Student's two-tailed t-test values are given comparing expression between pCMV and pCMV-p53wt cotransfections (in a) or Nutlin-3 and DMSO treatment (in b, \*\*\* P<0.001).

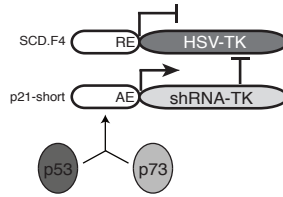

### WT-2G clone

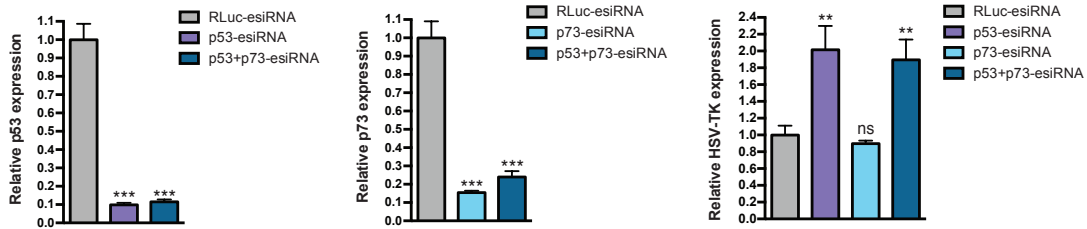

**Supplementary figure 2: The 2G sensor is responsive to endogenous levels of p53, but not p73.** Top; scheme of the p53 repressive network with HSV-TK as the primary output. Bottom; p53 and p73 were knocked down in WT-2G cells either separately or in tandem using esiRNAs. The left and the middle plot show the extent of p53 and p73 downregulation, respectively, while the right bar plot depicts the increase in HSV-TK expression only upon p53 knock down, but not p73 knock down. A non-targeting (RLuc-esiRNA) silencing trigger served as control. All expression levels were determined by qPCR. Error bars represent SD of 3 independent experiments and Student's two-tailed t-test values are given (\*\* $P < 0.01$ , \*\*\*  $P < 0.001$  and ns – not significant).

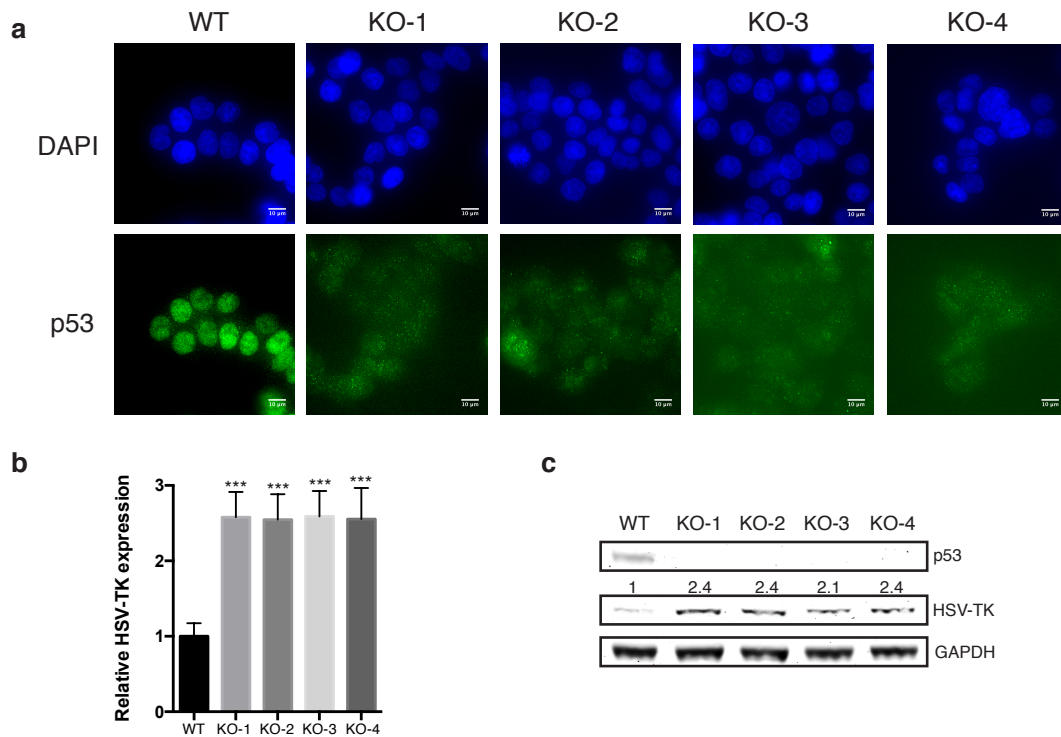

**Supplementary figure 3: Different KO clones derived from the WT-2G clone all exhibit increased HSV-TK expression.** (a) Representative immunofluorescence (IF) images of DAPI (top panel) and p53 antibody-stained (bottom panel) WT-2G cells and four KO clones. Scale bars represent 10  $\mu\text{m}$ . (b) Comparison of HSV-TK expression of WT-2G and four KO clones as determined by qPCR. KO-1 clone was used in all subsequent experiments and was termed KO-2G. Error bars depict SD of 3 independent experiments and Student's two-tailed t-test values are given (\*\*\*)  $P < 0.001$ . (c) Western blot shows upregulation of HSV-TK protein levels in four different KO clones derived from WT-2G clone. The relative quantification of the HSV-TK band signals is provided.

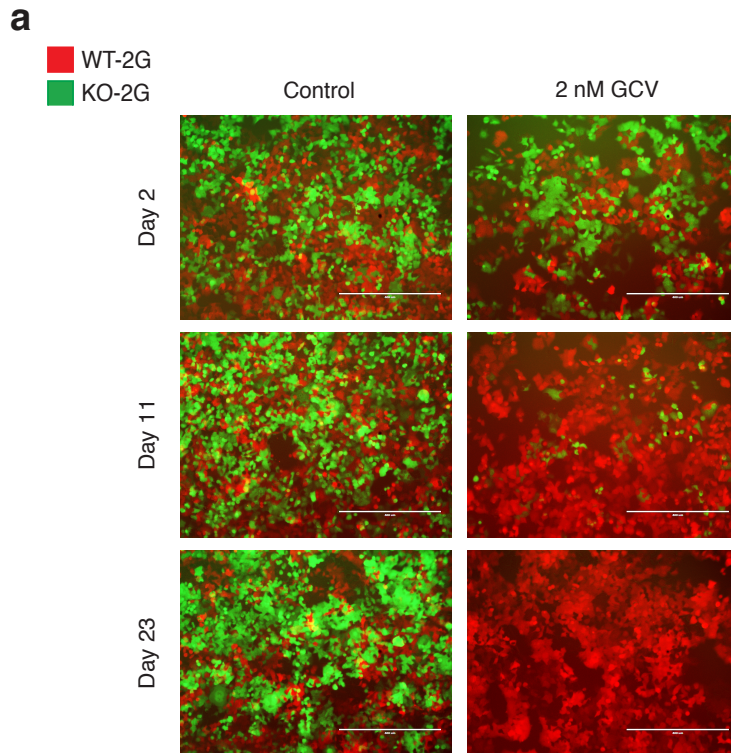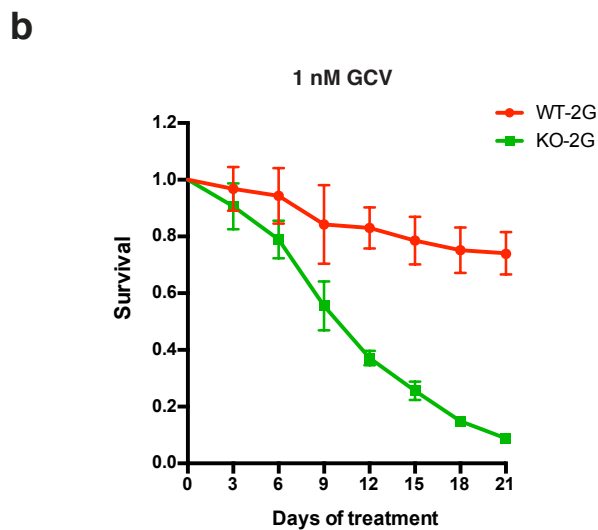

**Supplementary figure 4: Low Ganciclovir concentration targets almost exclusively KO-2G cells.** (a) Representative images of the two-color assay in which a mix of WT-2G (m-Cherry tagged) and KO-2G (GFP-tagged) cells was either treated with 2 nM GCV or control (water) for indicated period of time. Scale bars represent 400  $\mu$ m. (b) WT-2G and KO-2G cells were separately treated with 1 nM Ganciclovir over a period of time. Scatter plot shows the ratio of cell number in treatment versus control group (water) for both cell types during 21 days. Error bars depict SD of 3 independent experiments.

**a**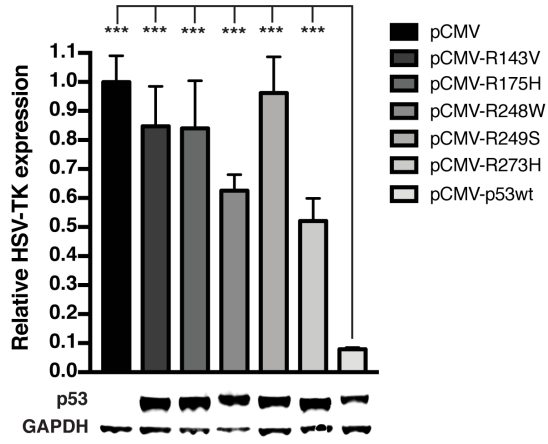**b**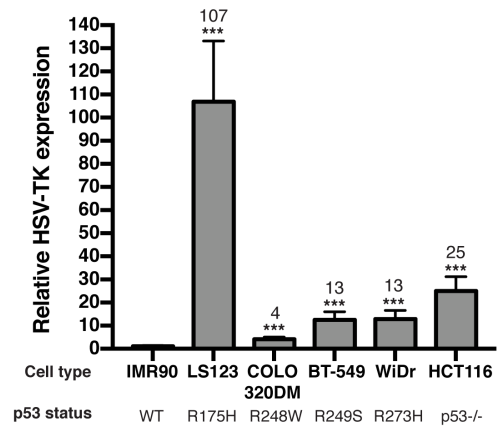**c**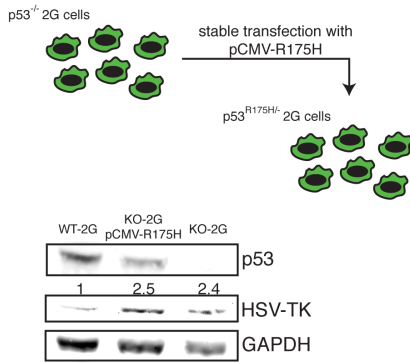**d**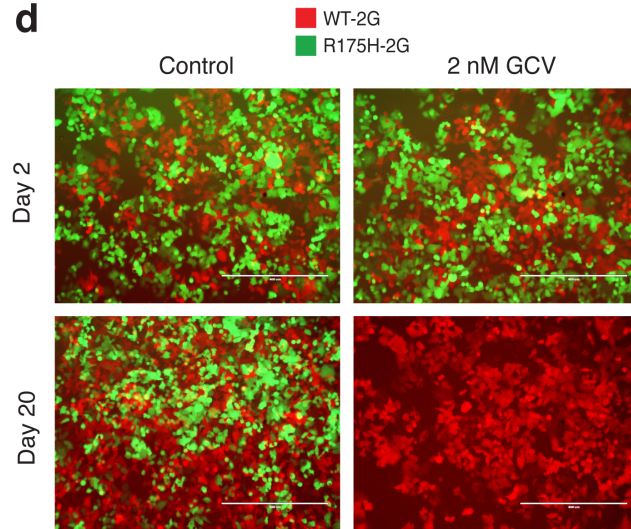**e**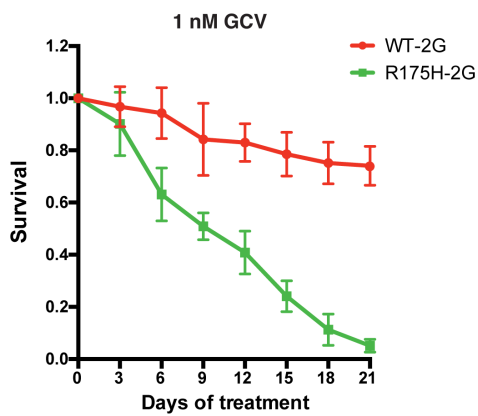

**Supplementary figure 5: The 2G sensor detects a mutant version of p53 and sensitizes the cells expressing the mutant to Ganciclovir.** (a and b) SCD.F4-HSV-TK and p21-short-shRNA (against HSV-TK) were transiently expressed and HSV-TK expression was measured by qPCR. (a) p53 mutants fail to effectively repress the sensor in co-transfection experiments. The bar plot depicts HSV-TK expression of the sensor cotransfected with either WT p53 or five p53 hot spot mutants in HCT116 p53 KO cells. Western blot shows protein levels of WT and mutant p53 and GAPDH as a loading control below the graph. All error bars represent SD of 3 independent experiments and Student's two-tailed t-test values are given (\*\**P*<0.001), comparing HSV-TK expression between p53 WT cotransfection and each of the mutants'. (b) Cancer cell lines harboring p53 mutations are vulnerable to the sensor. The bar plot depicts HSV-TK expression of the sensor in p53 WT primary fibroblasts (IMR90) and five cell lines with p53 alterations (LS123, COLO320DM, WiDr and HCT116 are colorectal adenocarcinoma cells, while BT-549 are mammary gland ductal carcinoma cells). The ratios of HSV-TK expression compared to the primary fibroblasts are indicated above each bar. The p53 status for each cell line is shown below the graph. All error bars represent SD of 3 independent experiments and Student's two-tailed t-test values are given (\*\**P*<0.001), comparing HSV-TK expression between IMR90 (p53 WT) and each of the mutant-expressing cell lines. (c) Top; schematic representation of stable integration of p53 R175H overexpression construct in KO-2G clone. Bottom; western blot showing that stably expressed R175H p53 mutant cannot repress HSV-TK levels. The relative quantification of the HSV-TK band signals is provided. (d) Representative images of the two-color assay in which a mix of WT-2G (m-Cherry tagged) and KO-2G-R175H (R175H, GFP-tagged) cells was either treated with 2 nM GCV or control (water) for indicated period of time. Scale bars represent 400  $\mu$ m. (e) WT-2G and KO-2G-R175H cells were separately treated with 1 nM Ganciclovir over a period of time. Scatter plot shows the ratio of cell number in treatment versus control group (water) for both cell types during 21 days. Error bars depict SD of 3 independent experiments.

**a**

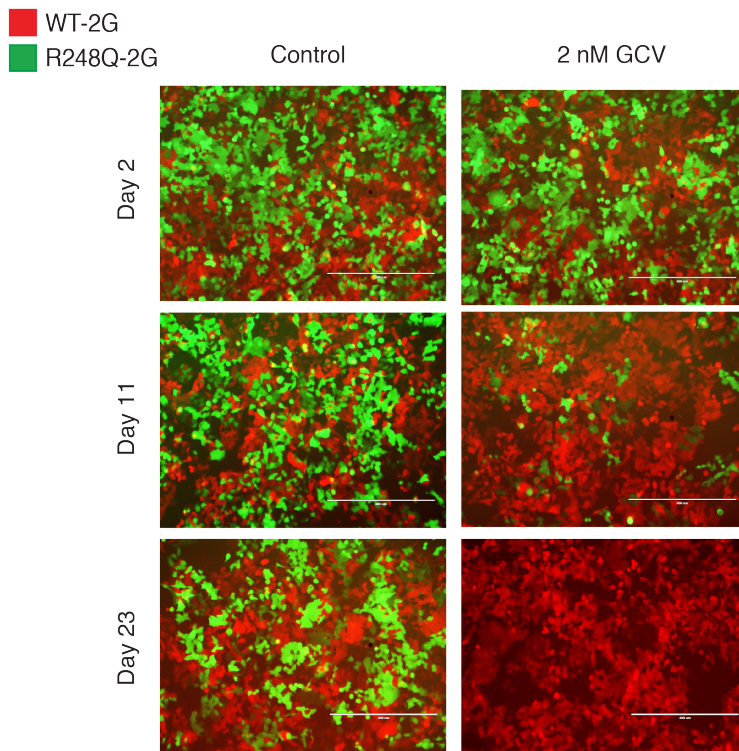

**b**

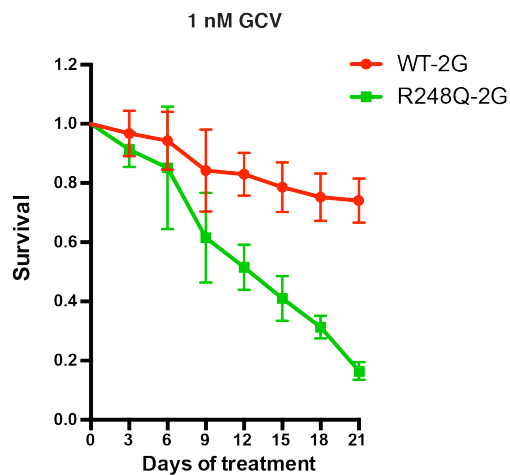

**Supplementary figure 6: Low Ganciclovir concentration targets almost exclusively R248Q cells.** (a) Representative images of the two-color assay in which a mix of WT-2G (m-Cherry tagged) and R248Q-2G (GFP-tagged) cells was either treated with 2 nM GCV or control (water) for indicated period of time. Scale bars represent 400 μm. (b) WT-2G and R248Q-2G cells were separately treated with 1 nM Ganciclovir over a period of time. Scatter plot shows the ratio of cell number in treatment versus control group (water) for both cell types during 21 days. Error bars depict SD of 3 independent experiments.

**a**

*Trp53*  
floxed

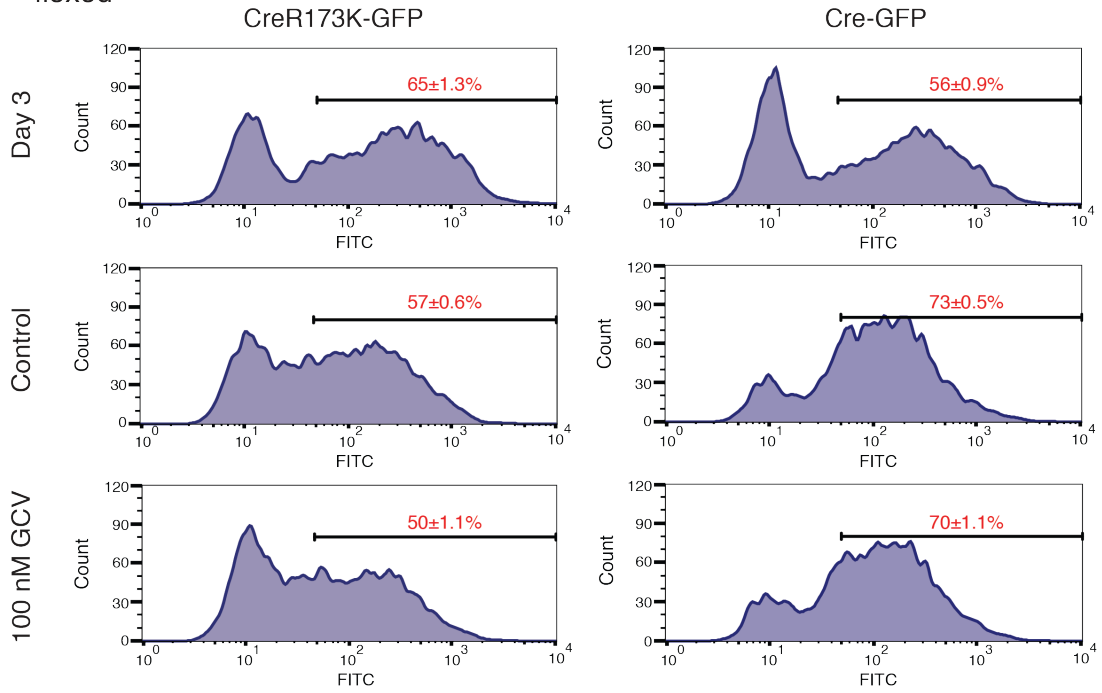

**b**

WT-2G

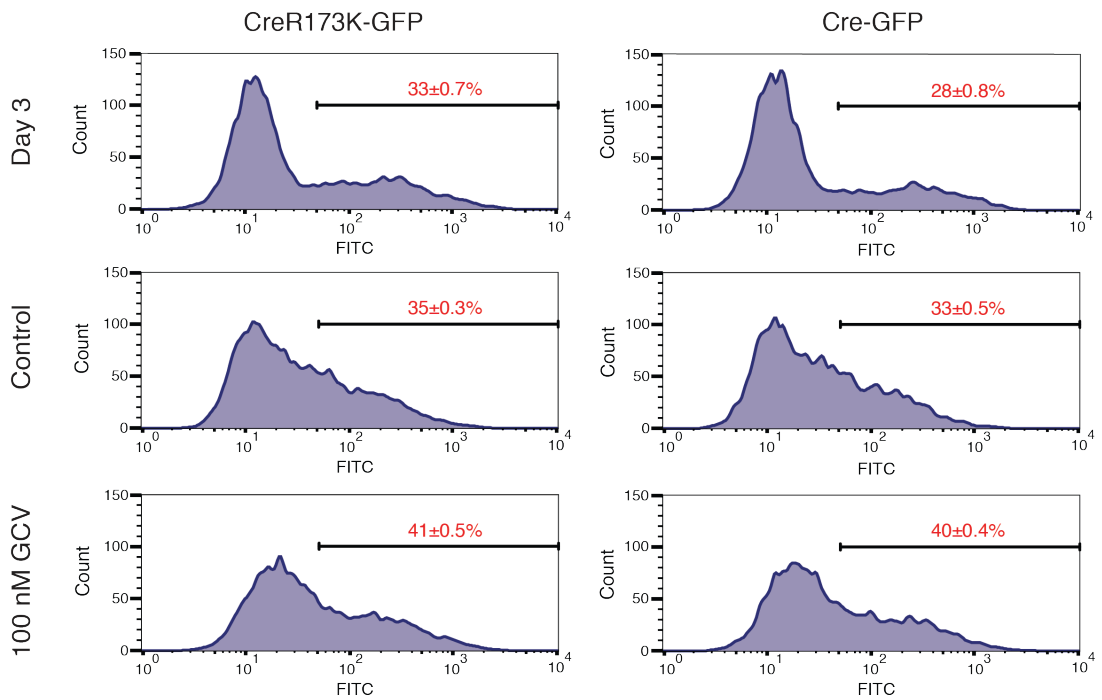



**Supplementary figure 7: Controls for *Trp53* floxed MEF experiments.** FACS histograms depicting the distribution of GFP intensity (GFP positive values are marked with the scale bar) for *Trp53* floxed MEFs (top panel) and WT-2G MEFs (bottom panel) upon transduction with bicistronic Cre-GFP retrovirus (right-hand side) or inactive Cre-GFP retrovirus (left-hand side) in the presence of 5  $\mu$ M Nutlin-3. The distribution of GFP intensity is shown three days post transduction (top row), and after 6 days of additional control treatment (middle row) or 100 nM GCV treatment (bottom row). Mean percentages of GFP positive cells of three replicates are shown.

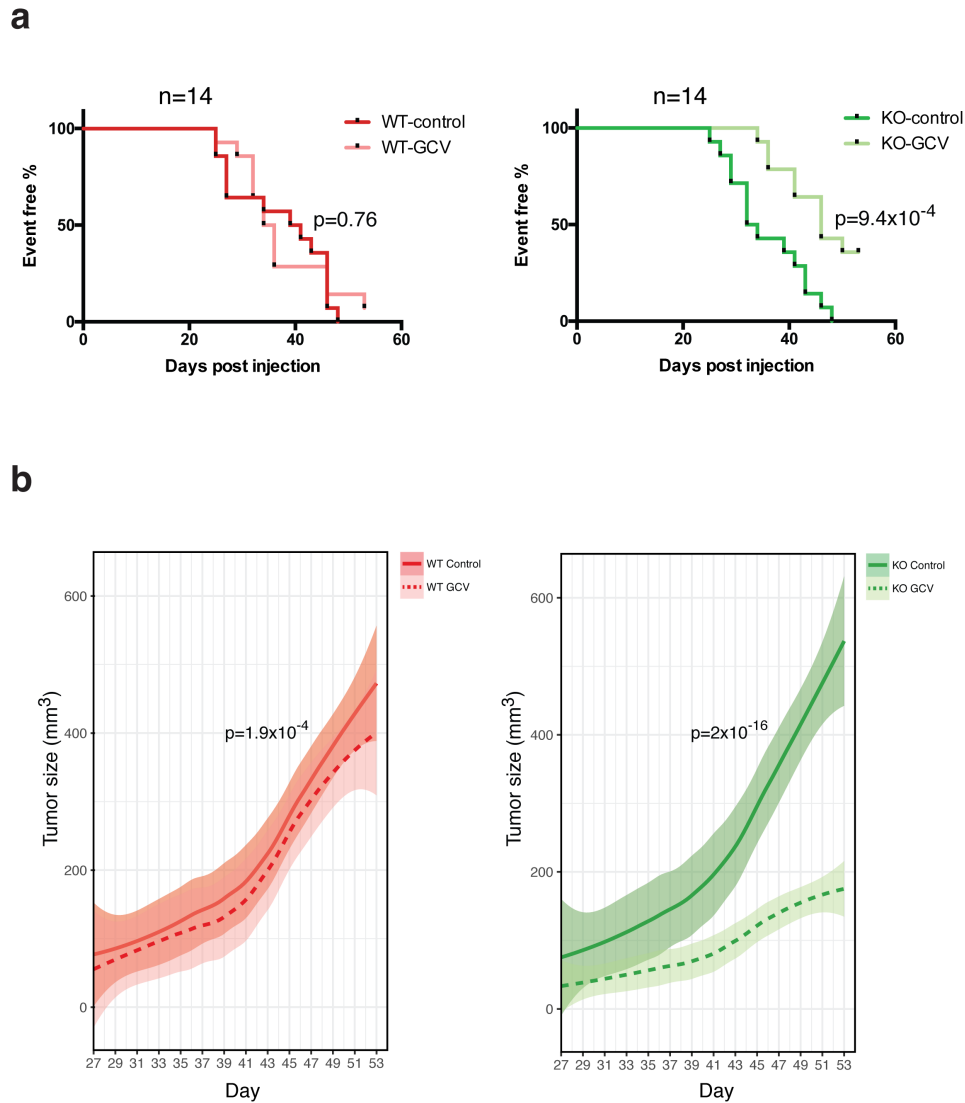

**Supplementary figure 8: The sensor specifically targets KO-2G cells *in vivo*. (a)**

Kaplan-Meier graphs show the proportion of mice without palpable tumors (set volume of  $100 \text{ mm}^3$ ) as a function of post-injection time (in days). The left graph compares palpability of WT-2G tumours between mice treated with water ( $n=14$ ) and GCV ( $n=14$ ), while the right graph compares palpability of KO-2G tumours between the same two groups. P values comparing palpability of WT-2G (control vs. GCV) and KO-2G (control vs. GCV) tumors are given. (b) Comparison of average tumour volumes of WT-2G (left) and KO-2G (right) tumours treated with either control (water) or GCV. The curves show results of loess regressions of tumor sizes over time (span = 0.75) and the semi-transparent ribbons indicate 0.95 confidence intervals around the smooth. Indicated p-values are results of likelihood ratio tests comparing linear mixed effects models to respective nested models without an effect of cell type on tumor size.

**a**

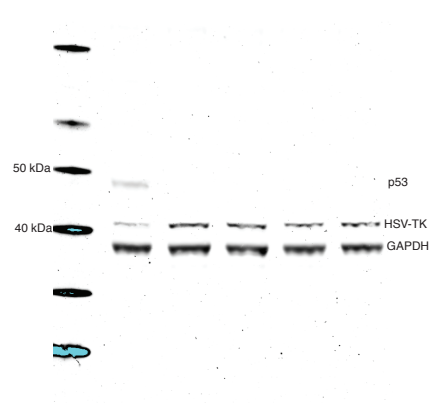

**b**

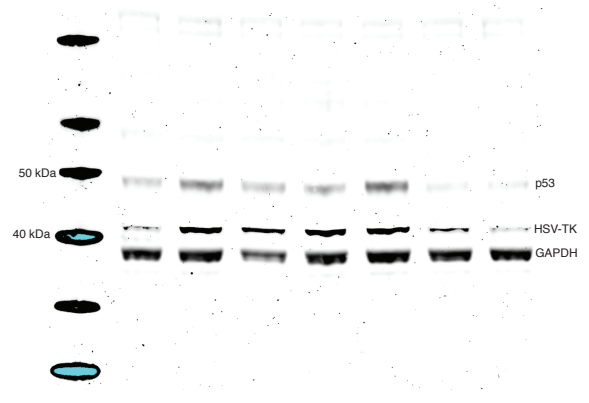

**c**

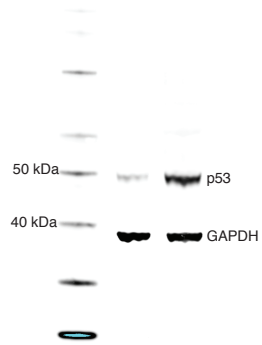

**d**

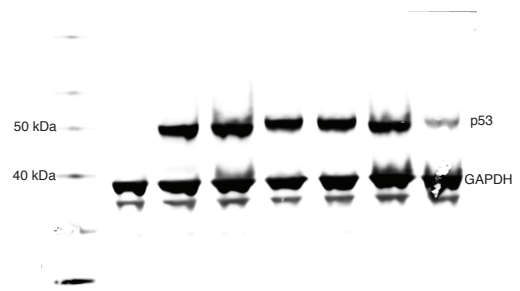

**e**

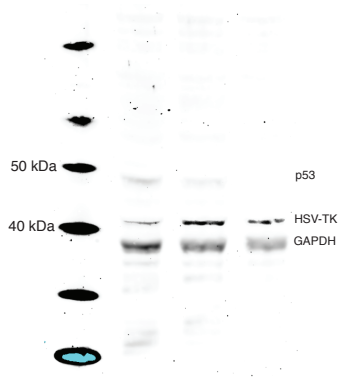

**f**

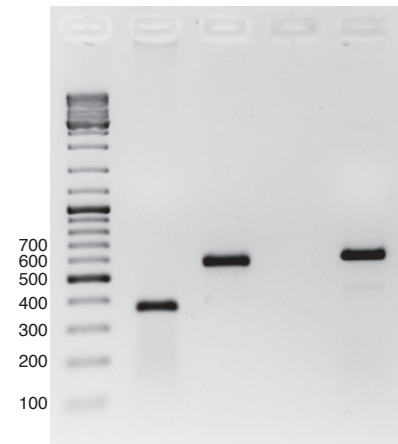

**Supplementary figure 9: Uncropped versions of Western blots and the agarose gel used in the study. (a) Western blot from Fig. 2c and Supporting Fig. 3c. (b) Western blot from Fig. 3c. (c) Western blot from Supporting Fig. 1b. (d) Western blot from Supporting Fig. 5a. (e) Western blot from Supporting Fig. 5c. (f) Agarose gel electrophoretogram from Fig. 4a.**

Supplementary Table 1. The complete sequence of the 2G plasmid.

| 2G                                                                                                                                                                                                                                                                                                                                                                                                                                                                                                                                                                                                                                                                                                                                                                                                                                                                                                                                                                                                                                                                                                                                                                                                                                                                                                                                                                                                                                                                                                                                                                                                                                                                                                                                                                                                                                                                                                                                                                                                                                                                                                                                                                                                                                                                                                                                                                                                                                                                                                                                                                                                                                                                                                                                                                                                                                                                                                                                                                                                                                                                                                                                                                                                                                                                                                                                                                                                                                                                                                                                                                                                                                                                                                                                                                                                                                                                                                                                                                                                                                                                                                                                                                                                                                                                                                                                                                                                                                                                                                                                                                                                                                                                                                                                                                                                                                                                                                                                                                                                                                                                                                                                                                  |
|---------------------------------------------------------------------------------------------------------------------------------------------------------------------------------------------------------------------------------------------------------------------------------------------------------------------------------------------------------------------------------------------------------------------------------------------------------------------------------------------------------------------------------------------------------------------------------------------------------------------------------------------------------------------------------------------------------------------------------------------------------------------------------------------------------------------------------------------------------------------------------------------------------------------------------------------------------------------------------------------------------------------------------------------------------------------------------------------------------------------------------------------------------------------------------------------------------------------------------------------------------------------------------------------------------------------------------------------------------------------------------------------------------------------------------------------------------------------------------------------------------------------------------------------------------------------------------------------------------------------------------------------------------------------------------------------------------------------------------------------------------------------------------------------------------------------------------------------------------------------------------------------------------------------------------------------------------------------------------------------------------------------------------------------------------------------------------------------------------------------------------------------------------------------------------------------------------------------------------------------------------------------------------------------------------------------------------------------------------------------------------------------------------------------------------------------------------------------------------------------------------------------------------------------------------------------------------------------------------------------------------------------------------------------------------------------------------------------------------------------------------------------------------------------------------------------------------------------------------------------------------------------------------------------------------------------------------------------------------------------------------------------------------------------------------------------------------------------------------------------------------------------------------------------------------------------------------------------------------------------------------------------------------------------------------------------------------------------------------------------------------------------------------------------------------------------------------------------------------------------------------------------------------------------------------------------------------------------------------------------------------------------------------------------------------------------------------------------------------------------------------------------------------------------------------------------------------------------------------------------------------------------------------------------------------------------------------------------------------------------------------------------------------------------------------------------------------------------------------------------------------------------------------------------------------------------------------------------------------------------------------------------------------------------------------------------------------------------------------------------------------------------------------------------------------------------------------------------------------------------------------------------------------------------------------------------------------------------------------------------------------------------------------------------------------------------------------------------------------------------------------------------------------------------------------------------------------------------------------------------------------------------------------------------------------------------------------------------------------------------------------------------------------------------------------------------------------------------------------------------------------------------------------------------|
| ACTCTTCCTTTTCAATATATTGAAGCATTTATCAGGGTTATTGTCTCATGAGCGGATACATATTTGAATGTATT<br>TAGAAAAATAAACAAATAGGGGTTCGCGCACATTTCCCGGAAAAGTGCCACCTAAATTTGTAAGCGTTAATATTTT<br>GTTAAATTCGCGTTAAATTTTGTAAATCAGCTCATTTTTAACCAATAGGCCGAAATCGGCAAAATCCCTTAT<br>AAATCAAAGAATAGACCGAGATAGGGTTGAGTGTGTTCAGTTTGAACAAGAGTCCACTATTAAGAACGTGG<br>ACTCCAACGTCAAAGGGCGAAAACCGTCTATCAGGGCGATGGCCACTACGTGAACCATCACCTAATCAAGTTT<br>TTTGGGGTCGAGGTGCCGTAAAGCACTAAATCGAACCCCTAAAGGGAGCCCCGATTTAGAGCTTGACGGGGAAAG<br>CCGGCGAACGTGGCGAGAAAGGAAGGGAAGAAAGCGAAAGGAGCGGGCGCTAGGGCGCTGGCAAGTGTAGCGGTCA<br>CGCTGCGCGTAACCACCACACCCGCGCGCTTAATGCGCCGCTACAGGGCGCGTCCCATTCGCCATTAGGCTGCG<br>CAACTGTTGGGAAGGGCGATCGGTGCGGGCCTCTTCGCTATTACGCCAGCTGGCGAAAGGGGGATGTGCTGCAAGG<br>CGATTAAGTTGGGTAACGCCAGGGTTTTCCAGTACAGCGTTGTAAACGACGGCCAGTGAGCGCGCCTCGTTCA<br>TTCACGTTTTGAACCCGTGGAGGACGGGCAGACTCGCGGTGCAAATGTGTTTTACAGCGTGATGGAGCAGATGAA<br>GATGCTCGACACGTGCAACACAGCAGCTAGATTAACCTAGAAAGATAATCATATTGTGACGTACGTTAAAGAT<br>AATCATGCGTAAATTTGACGCATGTGTTTTATCGGTCTGTATATCGAGGTTTATTTATTAATTTGAATAGATATTA<br>AGTTTTATATATTTACACTTACATACTAATAATAAATTCACAAACAATTTATTTATGTTTTATTTATTTATTTAAA<br>AAAAAACAAAACCTCAAAATTTCTTCTATAAAGTAACAAAACCTTTTATGAGGGACAGCCCCCCCCAAAGCCCCCA<br>GGGATGTAATTACGTCCCTCCCCGCTAGGGGGCAGCAGCGAGCCGCCGGGGCTCCGCTCCGGTCCGGCGCTCCC<br>CCCGATCCCCGAGCGCAGCGTGCAGGGACAGCCGGGCACGGGAAGGTGGCACGGGATCGCTTTCCTCTGAA<br>GGCTTCCGCGTCCCCAAGCTCCAGATCTTGGGGTGGCTGCCACGTCTCCCTGCCACGCGCCTGGGGGACGGAA<br>TGAATTTGGCTTGCAGTAATAATTCAATACCTGCCAGCTATTCTTATTCCACATCCAAGCCCTTTCGCTGCTGCTG<br>GGTGAACACATGTGCTGCTTCTGACGGTTTCCACAAAGAAGATTCCAAAATTACAACCTGCCAGTCTGAAGA<br>ATCTCCAAAACATCCCGCACGCATCCTGGAGGCGCGGGCTTGGGGATGGGACTGCCCGCCCGGTCTGAACAGGA<br>TGCGTGCAGCGCAGGCACACACACCAGCCAGCCTGTGTGTGCGGCGGAGTCCGGTGCCTCCGGGTGAGCAGC<br>GCGTGGCTGGTGGGCGGGGAGAGCCATGTTTCGAGGCGTACCGAGTCCCCGCGCTGCCCGGGAGGGAGCGG<br>GGCTTCCGCGTCCCCAAGCTCCAGATCCTGGGGTGGCTGCCACGTCTCCCTGCCACGCGCCTGGGGGACGGAA<br>GACGGGACGGAGATGTTAGTGGTGGGCGCCCCGAGGGTTACCAGTGTTCCTGAGAACTTCCCAGTGCCCA<br>CCCACCGTCTCCGTGTGCCGAGGGCGGTCTGGGCTAGGCTCCGCGCCCCAGCCCCAAACGGGTCCCAGC<br>CCCTTCCAGAGAGAAAGCTCCCGACGCGGGATGCCGGGCAGAGGCCAGCGCGGGTGAAGAGAAGCTGAGAAGG<br>AGAAACAGAGGGGAGGGGAGCGAGGAGCTGGCGGCAGAGGGAACAGCAGATTGCGCCGAGCCAATGGCAACGGCA<br>GGACGAGGTGGCACCATAATCCCTTCGGCCAATGACGAGCGGAGTTTACAGAAGCCTCATTAGCATTTCCCAGA<br>GGCAGGGGACGGGCGAGGCGGGTGGTGTGCTGCTGCGCAGCATCCCCGGCGCCTGCTGCGGTCCCGCGC<br>CGAGCCTCGGCTCTGTCTCCTCCCCCTCCCGCCTTACCCTCACGCGGGACCGCCGCGCCAGTCAACTCCTCGC<br>ACTTTGCCCTGCTTGGCAGCGGATAAAAGGGGGCTGAGGAAATACCGGACACGGTCCACCGTTGCCAGCTTAGC<br>CTTTAAATTTCCCGGCTCGGGGACCTCCACGCACCGCGGTAGCGCCGACAACAGCTAGCGTCAAGGCGCCCGG<br>CTCAGCGCTACCGGCGGGCTTCGAAACCGCAGTCTCCGGCAGCCCCGAACTCCGCTCCGGAGCCTCAGCCCCCT<br>GGAAGGTGATCCCGGCATCCGAGAGCCAAGATCCCGCCACTTGCTGCAGGACGTTGTGAGTTTCCAGCCTGGC<br>CCCGTACCGCGGGTGCAGGCGCGGGCTGGGCTTCCAGGGGACGGGTTGGTGGCAGAAGAGAGGGGAGAGCTCCG<br>CGGAGGACTTGGTCACTTTTTTCGAGTTGTGCTGCCTCCGTGAGTTGGGAAAGTGGATTGTAATTTGGGGACTTG<br>AGTCTCCAACTTTAGTTTTCTAAGCTTTAAAGAAAATCCGGTCTGTGCTGTTTAAAGATTAAGCGGGTTTT<br>CCTTTGTCTTCGTGGGGAAGTGAAGTCTTTACTTCTCCTTCCCTACTGCCGCTCCCGATAGGTTTCGCGCCCCCTC<br>TCCCCCTCGCCCTCCGCCCTATTGTATCTGTACAGTTTACAGGAACTTTTCTCCGTTGCGTCTCGGATACACCT<br>ACCCTCAGTGAACACTACGGCGCTGCGGAAGGTCCGACTGTTCACCCTTCCCCAGCGTATAGAGAGCGGAGTG<br>GCCAGCTGCCTCCACGTGTCTTCTCCTGACTCTCCTTCTCGAGATCTGCGATCTAAGTAAGCTTATGGCT<br>TCGTACCCCTGCCATCAACACGCTCTGCGTTCGACCAGGCTGCGGTTCTCGCGGCCATAGCAACCGACGTACGG<br>CGTTGCGCCTCGCCGGCAGCAAGAAGCCACGGAAGTCCGCTGGAGCAGAAAATGCCACGCTACTGCGGGTTTA<br>TATAGACGGTCTCACGGGATGGGAAAACCACCACCACGCAACTGCTGGTGGCCCTGGGTTTCGCGCGACGATATC<br>GTCTACGTACCCGAGCCGATGACTTACTGGCAGGTGCTGGGGGCTTCCGAGACAATCGCGAACATCTACACCAC<br>AACACCGCTCGACCAAGGTGAGATATCGCCGGGGACCGCGGTTGGTAATGACAAGCGCCAGATAACAATGGG<br>CATGCCTTATGCCGTGACCAGCGCGTTCGGCTCCTCATATCGGGGGGAGGCTGGGAGCTCACATGCCCGCCC<br>CCGGCCCTACCCCTCATCTTCGACCGCCATCCCATCGCCGCCCTCCTGTGCTACCCGGCCGCGGATACCTTATGG<br>GCAGCATGACCCCCAGGCGGTGCTGGCGTTCGTGGCCCTCATCCCGCCGACCTTGCCCGGACAAAACATCGTGT<br>GGGGGCCCTTCCGGAGGACAGACACATCGACCCTGGCCAAAACGCCAGCGCCCCGGCGAGCGGCTTGACCTGGCT<br>ATGCTGGCCGCGATTCCCGCGTTCAGGGCTGCTGGCAATACGTTGCGGTATCTGACGGCGCGGCTGCTGGC<br>GGGAGGATTTGGGACAGCTTTTCGGGGACGGCCGTGCCGCCACTAGGTTGCCGAGCCCCAGAGCAACGCGGGCCACG<br>ACCCCATATCGGGGACACGTTATTTACCCTGTTTCGGGCCCCGAGTTGCTGGCCCCAACGGCGACCTGTACAAC<br>GTGTTTGCCTGGGCCTTGGAGCTTTGGCCAAACGCCTCCGTCCTCATGCACGTCTTTATCCTGGATTACGACCAAT<br>CGCCCCCGGCTGCCGGGACGCCCTGCTGCAACTTACCCTCCGGGATGGTCCAGACCCACGTACCACCCCCGGCTC<br>CATAACGACATCTGCGACCTGGCGCGCAGTTTGGCCGGGAGATGGGGGAGGCTAACTGAGTCTAGACACCTACG<br>CAAGCTGACCCCTGAAGTTTCACTGACACGCAAGTGCCTGAAGTTTCACTACCTACGCGAAGTGCACCTGACCTGAA<br>GTTTCACTGACACAGGCGCGGCTTTCGAGCAGACATGATAAGATACTTATGAGTTTGGACAAACCAACTAG<br>AATGCAGTGAATAAATGCTTTATTTGTGAAATTTGTGATGCTATTGCTTTATTTGTAACCATATAAGCTGCAAT<br>AAACAAGTTAACAACAACAAATGCAATTTATGTTTTCAGGTTTCAGGGGAGGTTGGGAGGTTTTTTAAAGCA<br>AGTAAACCTCTACAAATGTGGTAAATTCGgaattcgaatttaaatcggaatccgcccgcggaaggatctgcatc<br>gctccggtgcccgtcagtgggcagagcgcacatcgcccacagtccccgagaagttggggggaggggtcggaattg<br>aacgggtgcctagagaagtgggcgcgggtaaaactgggaaagtgatgtcgtgtactggctccgctttttcccgag |

ggtgggggagaaccgtatataagtgcagtagtgcgctgaaacgttctttttcgcgaacgggtttgcccagaaacac  
agctgaagcttcgagggctcgcacatctctcttcacgcgcccgcgcccctacctgagggccgcatccacgcggtt  
gagtcgcttctgcccctcccgcctgtggtgctcctgaactgcgtccgctctaggttaagtttaagctcagg  
tcgagaccggcctttgtccggcgtcccttgagcctacctagactcagccgctctccacgctttgcctgacc  
tgcttgctcaactctacgtctttgtttctgtttctgctgcgcttacagatccaagctgtgaccggcgcctac  
gtagatgaccgagtaaacgcccaggtgcgctcgcaccgcgacgacgtccccagggccgtacgcaccctcgc  
cgccgcttcgcccactaccccgcacgcgcccacaccgctcagatccggaccgccacatcgagcgggtcaccgagctg  
caagaactcttctcgcgctcgggctcgcacatcgcaaggtgtgggtcgcggacgacgcccgcggtggcgg  
tctggaccacgcccggagagcgtcgaagcggggggggtgttcgcccagatcgcccgcgcatggccgagttgagcgg  
ttcccggctggccgcgagcaacagatggaagcctcctggcgcgacccggcccaggagcccgcgtggttctctg  
gccaccgtcggcgtctcgcggaccaccagggcaaggtctgggcagcgcgctcgtgctccccggagtgaggcgg  
ccgagcgcgcccgggtgcccgccttctggagacctcgcgcccgcgaacctcccccttctacgagcggctcggctt  
caccgtcaccgcccagctcaggtgcccgaagcgcgaccctggtgcatgaccgcgaagcccgggtgctgagtc  
gacaatcaacctctggattacaaaatttggaaagattgactggattcttaactatggtgctccttttactgctat  
gtggatacgtgctttaaagcctttgtatcatGTTAACTTGTATTGTCAGCTTATAATGGTTACAAATAAAGCAA  
TAGCATCAAAATTTACAAATAAAGCATTTTTTTACTGCATTCTAGTTGTGGTTGTCCAACTCATCAATGTA  
TCTTATCATGTCTGGAATTGACTCAAATGATGTCAATTAGTCTATCAGAAGCTATCTGGTCTCCCTTCCGGGGAC  
AAGCATCCCTGTTAATAATTTAAACAGCAGTGTCCCAAACCTGGGTCTTATATCCCTTGCCTGGTCAACCAGG  
TTGCAGGGTTTCTCTCCACAGGAACGAGTCCCTAAAGAAACAGTGGCAGCCAGGTTTACCCCGGAATTGAC  
TGGATTCTTTTTTAGGGCCATTGGTATGGCTTTTTCCCGTATCCCCCAGGTGTCTGCAGGCTCAAAGAGCAG  
CGAGAAGCCTCAGAGGAAAGCAGTCCCGTGCACCTTCCCGTGCCTGGGTGTCCCCGCAGCTGCCGGCTCGG  
GGATGCCGGGGGAGCGCCGACCGAGCGAGCCCGGGCGCTCGCTGCTGCCCTTAGCGGGGAGGGACGTAA  
TTACATCCCTGGGGGCTTTGGGGGGGGCTGTCCCTGATATCTATAACAAGAAAATATATATAATAAGTTATCA  
CGTAAGTAGAACATGAAATAACAATATAATATCGTATGAGTTAAATCTTAAAGTCACGTAAGATAATCATGC  
GTCATTTTACTCACGCGTCTGTATAGTTCAAATCAGTACACTTACCATTGACAAGCAGCCCTCACGGGAG  
CTCCAAGCGGCGACTGAGATGTCCTAAATGCACAGCGACGGATTGCGCTATTTAGAAAGAGAGCAATATTTCA  
AGAATGCATAGGACAGCCCCCCCCAAAGCCCCAGGGATGTAATTACGTCCCTCCCCGCTAGGGGGCAGCAGC  
GAGCCGCCGGGGCTCCGCTCCGGTCCGGCTCCCCCGCATCCCCGAGCCGGCAGCGTGCAGGGACAGCCGGG  
CACGGGAAAGGTGGCACGGGATCGCTTCTCTGAACGCTTCTCGCTGCTCTTTGAGCCTGCAGACACCTGGGGG  
ATACGGGAAAGGCCCTCACGGCactagtAGCAGGCTGTGGCTCTGATTGGCTTTCTGGCATTAGGAACATGT  
CCCAACATTTGAGCTCTGCATAGAAGGCTGGTGGCTATTTTGTCTTGGCTAGCCCCGCTCGAGATCTGCG  
ATCTAAGTAAGCTTGAATATTGCTGTTGAATGAGGCTTCACTACTTTACAGAATCGTTGCCCTGCACATCTGGAA  
ACACTTGTGGGATTACTTCTCAGGTTAACCCAACAGAAGCTAAAGAAGGTATATTGCTGTGACAGTGAGCGG  
CAAGCTGACCCTGAAGTTCATTAGTGAAGCCACAGATGTAATGAACCTCAGGGTCAGCTTGTGCTACTGCCTCG  
GACTTCAAGGGGCTACTTTAGGAGCAATATCTTGTTTACTAAAACCTGAATACCTTGTATCTCTTTGATACATTT  
TTACAAAGCTGAATTTAAATGGTATAAAATTAATCACTTTAAACCATGTCTGTCTAGAGTCGGGGCGCCGGCG  
CTTCGAGCAGACATGATAAGATACATTGATGAGTTTGGACAAACACAACAGAAATGCAGTGAAGAAATGCTTTA  
TTTGTGAAATTTGTGATGCTATTGCTTTATTTGTAACCATATAAGCTGCAATAAACAAGTTAAACAACAATTTG  
CATTCAATTTATGTTTTCAGGTTTCCAGGGGAGGTGTGGGAGTTTTTTAAAGCAAGTAAACCTTACAAATGTGGT  
AAAATCGgaattcTCTCACAGGAACGAAGTCCCTAAAGAAACAGTGGCAGCCAGGTTTAGCCCCGAATTGACTG  
GATTCTTTTTTAGGGCCATTGGTATGGCTTTTTCCCGTATCCCCCAGGTGTCTGCAGGCTCAAAGAGCAGCG  
AGAAGGTTTTCAGAGAAAGCAGTCCCGTGCACCTTCCCCGTCCCGGGCTGTCCCGCAGCTCCGCTCGGCTCGGG  
ATGCGGGGGAGCGCCGACCGAGCGGAGCCCGGGCGGCTCGCTGCTGCCCTTAGCGGGGAGGGACGTAATT  
ACATCCCTGGGGGCTTTGGGGGGGGCTGTCCCTATGCATGCGTCAATTTTACGCAGACTATCTTTCTAGGGTTAA  
TCTAGCTGCATCAGGATCATATCGTCCGGTCTTTTTTCCGGCTCAGTCATCGCCAAGCTGGCGCTATCTGGGAT  
CGGGGAGGAAGAAGCCGTCCTTTTTCCCGCAGGTTGAAGCGGCATGGAAGAGTTTGGCCAGGATGACTGCTGC  
TACTTTGACGTTGAGCGAAAACGCACGTTTACCATGATGATTCGGGAAGGTGTGGCCATGCACGCCTTTAACGGTG  
AACTGTTTTCAGGCCACTGGGATACCAAGTTCGTGCGCTTTTTCCGGACACAGTTCCGGATGGTCAGCGGAA  
GCGCATCAGAACCCGAACAATACCGGCGACAGCCGGAACCTGCCGTGCCGGTGTGCAGATTAATGACAGCGGTGCG  
GCGCTGGGATATTACGTCAGCGAGGACGGGTATCCTGGCTGGATGCCGCAGAAATGGACATGGATACCCCGTGA  
TACCCGGCGGGCGCGCTTGGCGTAATCATGGTCATAGCTGTTTCTGTGTGAAATGTTTATCCGCTCACAAATCCA  
CACAAATACGAGCCGGAAGCATAAAGTGTAAAGCCTGGGGTGCCTAATGAGTGAGCTAACACATTAATTGCGT  
TGGCTCACTGCCCGCTTCCAGTCCGGAAACCTGTCTGTCAGCTGCATTAATGAATCGGCCAACGCAGGGGAG  
AGCGGTTTGCATATTGGCGCTCTTCCGCTTCTCCGCTACTGACTCGCTCGCTCGGTTCGGCTCGCGCGA  
GCGGTATCAGCTCACTCAAAGCGGTAATACGGTTATCCACAGAATCAGGGGATAACGCAGGAAAGAACATGTGAG  
CAAAGGCCAGCAAAGGCCAGGAACCGTAAAAGGCCGCTGTGCTGGCGTTTTTCCATAGGCTCCGCCCCCTGA  
CGAGCATCAAAAATCGACGCTCAAGTACAGAGTGGCGAAACCCGACAGGACTATAAAGATACCAGGCGTTTCCC  
CCTGGAAGCTCCCTCGTGCCTCTCTGTTCCGACCTGCCGCTTACCGGATACCTGTCCGCTTTCTCCCTTCGG  
GAAGCTGGCGCTTTCTCATAGCTCACGCTGATGATCTCAGTTCGGTGTAGGTCGTTCCGCTCAAGCTGGCTG  
TGTGCACCAACCCCGTTACGCCGACCCGCTCGCCTTATCCGGTAACATCGTCTTGTAGTCAACCCCGTAAAG  
CACGACTTATCGCCACTGGCAGCAGCCACTGGTAACAGGATTAGCAGAGCGAGGTATGTAGGCGGTGCTACAGAGT  
TCTTGAAGTGGTGGCTAACTACGGCTACACTAGAAGGACAGTATTTGGTATCTGCGCTCTGCTGAAGCCAGTTAC  
CTTCGGAAAAAGAGTTGGTAGCTCTTGATCCGGCAAACAACACCCGCTGGTAGCGGTGGTTTTTTTTGTTTGAAG  
CAGCAGATTACGCGCAGAAAAAAGGATCTCAAGAAGATCCTTTGATCTTTTCTACGGGTCTGACGCTCAGTGA  
ACGAAAACCTCACGTTAAGGATTTTGGTCTATGAGATTATCAAAAAGGATCTTACCTAGATCCTTTTAAATTA  
ATGAAGTTTAAATCAATCAAAGTATATATGAGTAAACTTGGTCTGACAGTTACCAATGCTTAATCAGTGAGGCA  
CCTATCTCAGCGATCTGTCTATTTCTGTTTATCCATAGTTGCTGACTCCCCGCTGTGTAGATAACTACGATACGGG  
AGGGCTTACCATCTGGCCAGTGTGCAATGATACCGCAGACCCACGCTCACCAGCTCCAGATTTATCAGCAAT  
AAACCAGCCAGCCGGAAGGGCCGAGCGCAGAAGTGGTCTGCAACTTTATCCGCTCCATCCAGTCTATTAATTGT

```

TGCCGGGAAGCTAGAGTAAGTAGTTCGCCAGTTAATAGTTTGCGCAACGTTGTTGCCATTGCTACAGGCATCGTGG
TGTCACGCTCGTCGTTTGGTATGGCTTCATTCAGCTCCGGTTCCCAACGATCAAGGCGAGTTACATGATCCCCAT
GTTGTGCAAAAAAGCGGTTAGCTCCTTCGGTCCTCCGATCGTTGTGAGAAGTAAGTTGGCCGCAGTGTTATCACTC
ATGGTTATGGCAGCACTGCATAATTCTCTTACTGTCATGCCATCCGTAAGATGCTTTTCTGTGACTGGTGAGTACT
CAACCAAGTCATTCTGAGAATAGTGTATGCGGCGACCGAGTTGCTCTTGCCCGGCGTCAATACGGGATAATACCGC
GCCACATAGCAGAACTTTAAAAGTGCTCATCATTGGAAAACGTTCTTCGGGGCGAAAACCTCAAGGATCTTACCG
CTGTTGAGATCCAGTTCGATGTAACCCACTCGTGCACCAACTGATCTTCAGCATCTTTTACTTTCACCAGCGTTT
CTGGGTGAGCAAAAACAGGAAGGCAAAATGCCGCAAAAAGGGAATAAGGGCGACACGGAAATGTTGAATACTCAT

```

**Supplementary Table 2. Cas9-induced indels in *TP53* locus in KO-2G and heterozygous clone.** Newly introduced stop codons are underlined (Ht – heterozygous).

|                       | Exon 2                                | Exon 4                                        | Exon 6                             |
|-----------------------|---------------------------------------|-----------------------------------------------|------------------------------------|
| <b>WT allele</b>      | TTTCAGACCTATGAAACTGTGAGTG             | TGCTGTCCCCGGA-CGATATTGAACAA                   | GTGGTGCCCTATGAGCCGCTGAGGTCTGGT     |
| <b>KO-2G allele 1</b> | TTTCAGACCTATG <u>AG</u> -AAACTGTGAGTG | TGCTGTCCCCGGA <u>A</u> CGATATTGAACAA          | GTGGTGCCCTATGAGCCGCTGAGGTCTGGT     |
| <b>KO-2G allele 2</b> | TTTCAGACCTATGAAACTGTGAGTG             | TGCTGTCCCCGGA-CGATATTGAACAA                   | GTGGTGCCC----- <u>TG</u> AGGTCTGGT |
| <b>Ht allele 1</b>    | TTTCAGACCTATGAAACTGTGAGTG             | TGCTGTCCCCGGA <u>A</u> CGATATT <u>G</u> AACAA | GTGGTGCCCTATGAGCCGCTGAGGTCTGGT     |

Supplementary Table 3. Sequences of primers used to construct luciferase- and HSV-TK-based 2G sensor.

| Name of the primers | Forward primer (5'-3')                                                                                                                                                                                                                        | Reverse primer (5'-3')                                                                                                                                                                                                                      |
|---------------------|-----------------------------------------------------------------------------------------------------------------------------------------------------------------------------------------------------------------------------------------------|---------------------------------------------------------------------------------------------------------------------------------------------------------------------------------------------------------------------------------------------|
| <b>CDC25C</b>       | TTTGGTACCGGTCTCTGGATTGCGATAA                                                                                                                                                                                                                  | AAAGCTAGCGGACCCTAAGGGGGACAATG                                                                                                                                                                                                               |
| <b>SCD</b>          | TTTGGTACCTCTTGTGAATTGGCTTGCAG                                                                                                                                                                                                                 | AAAGCTAGCAGCCGGAATTTAAAGGCTA                                                                                                                                                                                                                |
| <b>RGS13</b>        | TTTGGTACCATCTCATTGGGCCCTAAAT                                                                                                                                                                                                                  | AAAGCTAGCTTTCTCTGTTGCCCACTT                                                                                                                                                                                                                 |
| <b>F1</b>           | ATTTGGTACCGGCAGAGCCATTGTTTCGC                                                                                                                                                                                                                 | TAAACTCGAGCGTCGGGAGCTTTCTCTCTG                                                                                                                                                                                                              |
| <b>F2</b>           | TTAAGGTACCCAGAGAGAAAGCTCCCGAC                                                                                                                                                                                                                 | TTAACTCGAGTATTTCTCAGCCCCCTTTT                                                                                                                                                                                                               |
| <b>F3</b>           | ATTTGGTACCCGAGCCGGAGTTTACAGAAG                                                                                                                                                                                                                | TAAACTCGAGAAGAGGAGAGTCAGGA                                                                                                                                                                                                                  |
| <b>F4</b>           | ATTTGGTACCTCTTGTGAATTGGCTTGCAG                                                                                                                                                                                                                | TAAACTCGAGAAGAGGAGAGTCAGGA                                                                                                                                                                                                                  |
| <b>p21</b>          | TTTGGTACCTCTTGGGAGCCTGTGTGAAG                                                                                                                                                                                                                 | AAAGCTAGCACAGGCACCTTCTCCCACT                                                                                                                                                                                                                |
| <b>p21-short</b>    | TTTGGTACCGGCAGCAGGCTGTGGCTCTG                                                                                                                                                                                                                 | AAAGCTAGCCAAGGACAAAATAGCCACCA                                                                                                                                                                                                               |
| <b>BS2-PUMA</b>     | TTTGGTACCCGCTGCAGGAAACCCCGG                                                                                                                                                                                                                   | AAAGCTAGCCGCCCCGCGTGACGCTAC                                                                                                                                                                                                                 |
| <b>4xBS2-PUMA</b>   | TTTGGTACCGAGCTCTTACGCGTGCTAGGCT<br>GCAAGTCCTGACTTGTCCACACTCTGCAAGT<br>CCTGACTTGTCCCTAGGCTGCAAGTCCTGAC<br>TTGTCCACACTCTGCAAGTCCTGACTTGTCC<br>CTAGCCCCGGCTCGACAGCTGGACGTCGATA<br>TCGAATTCGGGTATATAATGGATCCGGTATC<br>GAGATCTGCGATCTAAGTAAGCTTAAA | AAAGCTAGCACTTAGATCGCAGATCTCGATA<br>CCGATCCATTATATACCCgaaatcGATATC<br>GACGTCCAGCTGTGAGCCCGGGCTAGGGAC<br>AAGTCAGGACTTGCAGAGTGTGGACAAGTCA<br>GGACTTGCAGCCTAGGGACAAGTCAGGACTT<br>GCAGAGTGTGGACAAGTCAGGACTTGCAGCC<br>TAGCACGCGTAAGAGCTCGGTACCAAA |
| <b>miR30a</b>       | TTTAAGCTTGAATATTGCTGTTTGAATGAGG                                                                                                                                                                                                               | AAATCTAGACAGACATGGTTTAAAGTGATT<br>TA                                                                                                                                                                                                        |
| <b>shRNA-FfLuc</b>  | GACGATATGGGCTGAATACAAATAGTGAAGC<br>CACAGATGTATTTGTATTTCAGCCCATATCGT<br>TTGCCTACTGCCTCGGACTTC                                                                                                                                                  | TGTATTTCAGCCCATATCGTCCGCTCACTGTC<br>AACAGCAAT                                                                                                                                                                                               |
| <b>shRNA-GFP</b>    | GCAAGCTGACCCGTAAGTTCATTAGTGAAGC<br>CACAGATGTAATGAACTTCAGGGTCAGCTTG<br>TTGCCTACTGCCTCGGACTTC                                                                                                                                                   | GAACTTCAGGGTCAGCTTGCCGCTCACTGTC<br>AACAGCAAT                                                                                                                                                                                                |
| <b>HSV-TK</b>       | TTTAAGCTTATGGCTTCGTACCCCTGCCA                                                                                                                                                                                                                 | AAATCTAGACTCAGTTAGCCTCCCCATCT                                                                                                                                                                                                               |
| <b>GFP.seed</b>     | TTTTCTAGACACCTACGGCAAGCTGACCCTG<br>AAGTTCATCTGCACCAGCAAGCTGACCCTGA<br>AGTTCATCACCTACGGCAAGCTGACCCTGAA<br>GTTTCATCTGCACCAGGCCGGCCTTT                                                                                                           | AAAGGCCGGCCTGGTGCAGATGAACTTCAGG<br>GTCAGCTTGCCGTAGGTGATGAACTTCAGGG<br>TCAGCTTGCTGGTGCAGATGAACTTCAGGGT<br>CAGCTTGCCGTAGGTGTCAGAAAA                                                                                                           |



Supplementary Table 4. Sequences of gRNAs used in the study.

| gRNA              | Sequence (5'-3')     |
|-------------------|----------------------|
| <i>TP53 gRNA1</i> | GATCCACTCACAGTTTCCAT |
| <i>TP53 gRNA2</i> | CCATTGTTCAATATCGTCCG |
| <i>TP53 gRNA3</i> | GGTGCCCTATGAGCCGCCTG |
| <i>R248Q gRNA</i> | CCGGTTCATGCCGCCATGC  |

Supplementary Table 5. Sequences of primers used to confirm mutations/indels in *TP53* and *Trp53* locus.

| Site of induced mutation/indel                           | Forward primer (5'-3')                                                   | Reverse primer (5'-3')                                                 |
|----------------------------------------------------------|--------------------------------------------------------------------------|------------------------------------------------------------------------|
| <b>gRNA1/2</b>                                           | CAGCCATTCTTTCTGCTC                                                       | GGAAGGGACAGAAGATGACA                                                   |
| <b>gRNA3</b>                                             | GCGCTGCTCAGATAGCGAT                                                      | GGCCCTTAGCCTCTGTAAGC                                                   |
| <b>R248Q</b>                                             | GGAGAATGGCGTGAACCTGG                                                     | GTCAGAGGCAAGCAGAGGCT                                                   |
| <b><i>Trp53</i> deletion confirmation primers (MEFs)</b> | <b>1:</b><br>CACAAAAACAGGTTAAACCCAG<br><b>3:</b><br>AAGGGGTATGAGGGACAAGG | <b>2:</b><br>AGCACATAGGAGGCAGAGAC<br><b>4:</b><br>GAAGACAGAAAAGGGGAGGG |

**Supplementary Table 6. Summary of oligonucleotides used for qPCR.** In addition, annealing temperatures used to run a qPCR reaction are also listed.

| <b>Gene name</b>     | <b>Forward primer (5'-3')</b> | <b>Reverse primer (5'-3')</b> | <b>Annealing temperature (°C)</b> |
|----------------------|-------------------------------|-------------------------------|-----------------------------------|
| <b><i>TP53</i></b>   | CCCAAGCAATGGATGATTTGA         | GGCATTCCTGGGAGCTTCATCT        | 60                                |
| <b><i>HSV-TK</i></b> | TGACTTACTGGCAGGTGCTG          | GTTATCTGGGCGCTTGTCAT          | 60                                |
| <b><i>GAPDH</i></b>  | CAGCCTCAAGATCATCAGCA          | TGTGGTCATGAGTCCTTCCA          | 60                                |
| <b><i>TBP</i></b>    | AGGTTAGAAGGCCTTGTGCTC         | GGAGAACAATTCTGGGTTTGATCA      | 60                                |
| <b><i>TP73</i></b>   | CGTGGAAGGCAATAATCTCTC         | GTTTCATGCCCCCTACACA           | 60                                |
| <b><i>GFP</i></b>    | GACGTAAACGGCCACAAGTT          | GAACTTCAGGGTCAGCTTGC          | 60                                |
